# Supplementary material for: Increased myofilament Ca2+ sensitivity and diastolic dysfunction as early consequences of Mybpc3 mutation in heterozygous knock-in mice
Source: PubMed Central journal article supplement — J Mol Cell Cardiol. 2012 Jun;52(6):1299–307. doi: 10.1016/j.yjmcc.2012.03.009 (PMC3370652; doi:10.1016/j.yjmcc.2012.03.009), 2012-06
Supplement: mmc2.pdf [file mmc2.pdf]

**Supplemental Table.** Resting sarcomere length (SL) in WT, Het and KI myocytes.

| <b>Genotype</b> | <b>n/N</b> | <b>SL in absence of n/N</b>           |      | <b>SL in presence of 10 mM BDM (<math>\mu\text{m}</math>)</b> |
|-----------------|------------|---------------------------------------|------|---------------------------------------------------------------|
|                 |            | <b>BDM (<math>\mu\text{m}</math>)</b> |      |                                                               |
| <b>WT</b>       | 32/11      | 1.84 $\pm$ 0.01                       | 79/6 | 1.89 $\pm$ 0.01*                                              |
| <b>Het</b>      | 42/11      | 1.82 $\pm$ 0.02                       | 66/7 | 1.94 $\pm$ 0.01* <sup>§</sup>                                 |
| <b>KI</b>       | 36/20      | 1.69 $\pm$ 0.02 <sup>§</sup>          | 88/8 | 1.90 $\pm$ 0.01*                                              |

All values are expressed as mean $\pm$ SEM of *n* myocytes and *N* mice. Comparisons between means were based on one-way ANOVA analysis followed by Bonferroni's *t*-test. \**P*<0.05 vs in the absence of 2,3-butanedione monoxime (BDM). <sup>§</sup>*P*<0.05 vs WT in the same condition.
